# Supplementary material for: Theoretical Studies on the Structure and Intramolecular Interactions of Fagopyrins—Natural Photosensitizers of Fagopyrum
Source: MDPI journal article supplement (doi:10.3390/molecules27123689), 2022-06-08
Supplement: s1 [file s1]

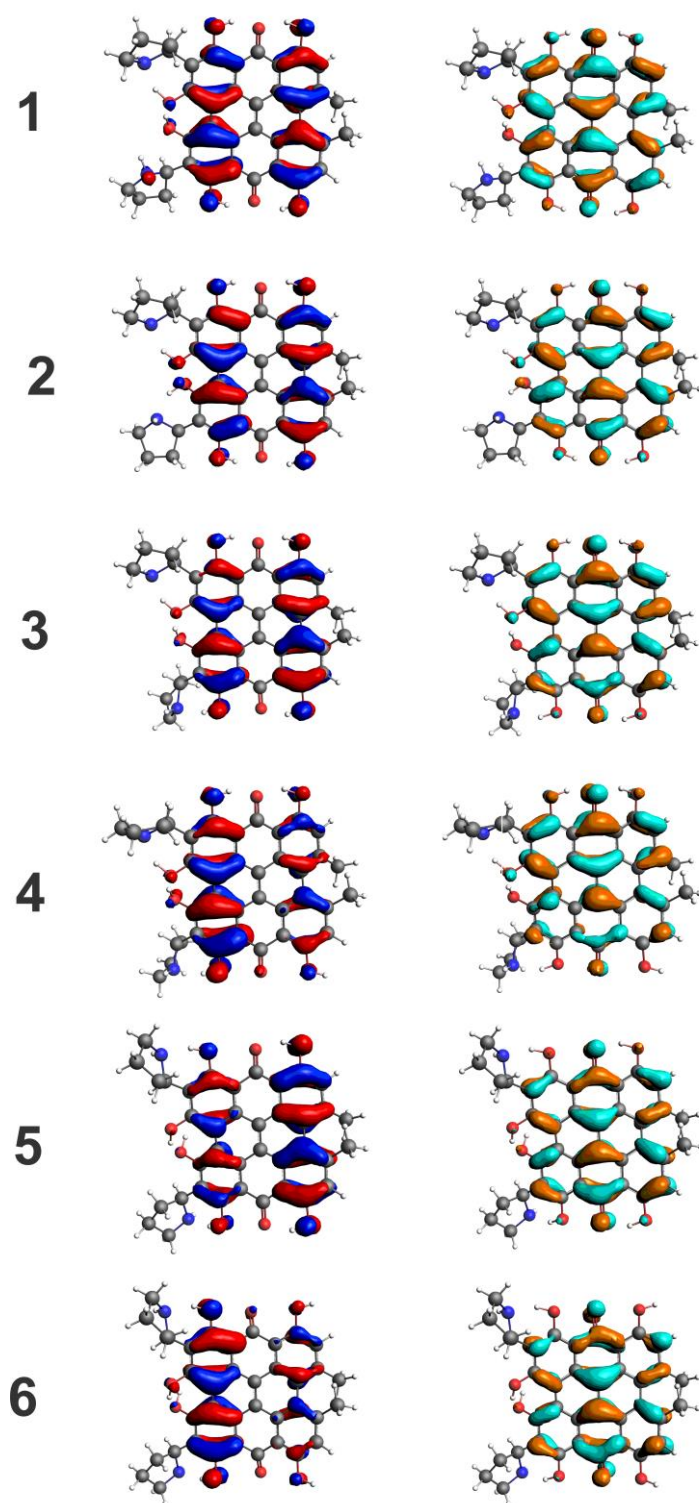

**Figure S1.** HOMO (left) and LUMO (right) orbitals for the 1, 2, 3, 4, 5, 6 Fagopyrin A conformers.

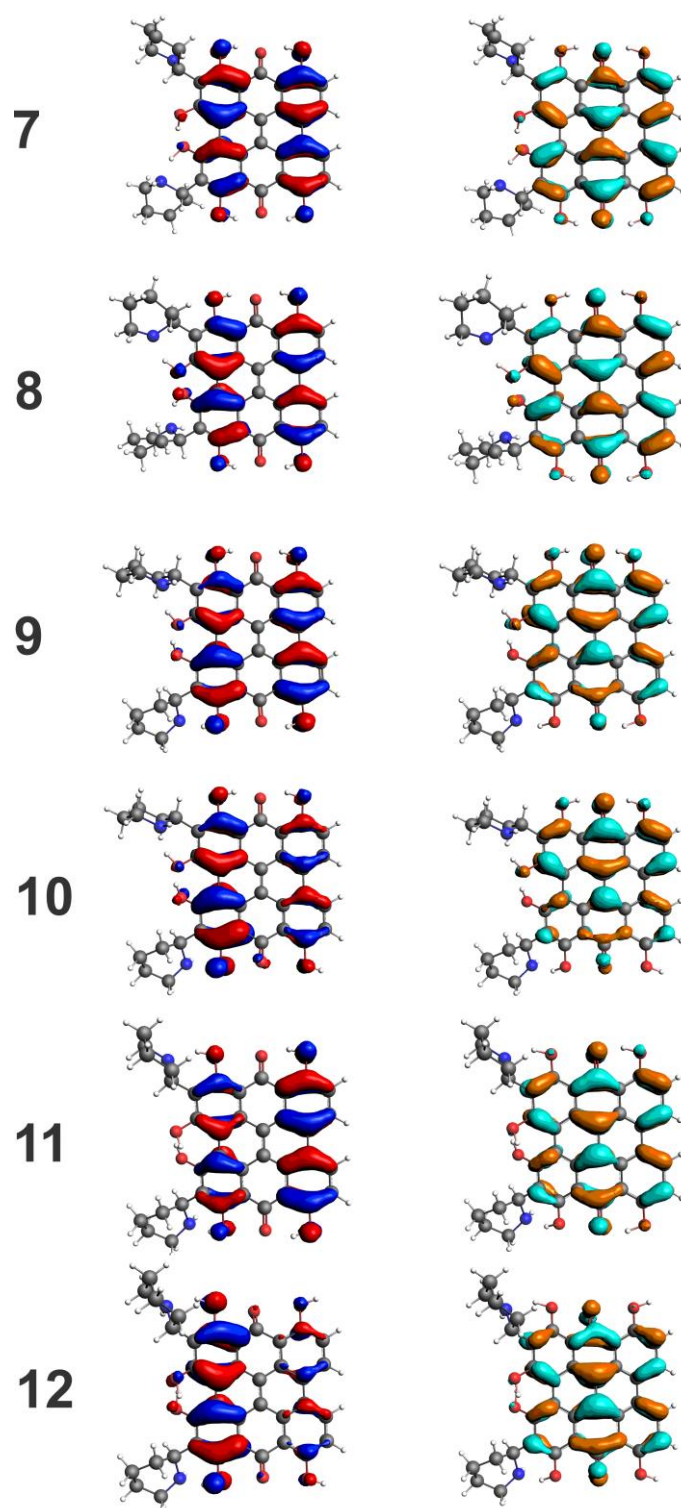

**Figure S2.** HOMO (left) and LUMO (right) orbitals for the 7, 8, 9, 10, 11, 12 Fagopyrin B conformers.

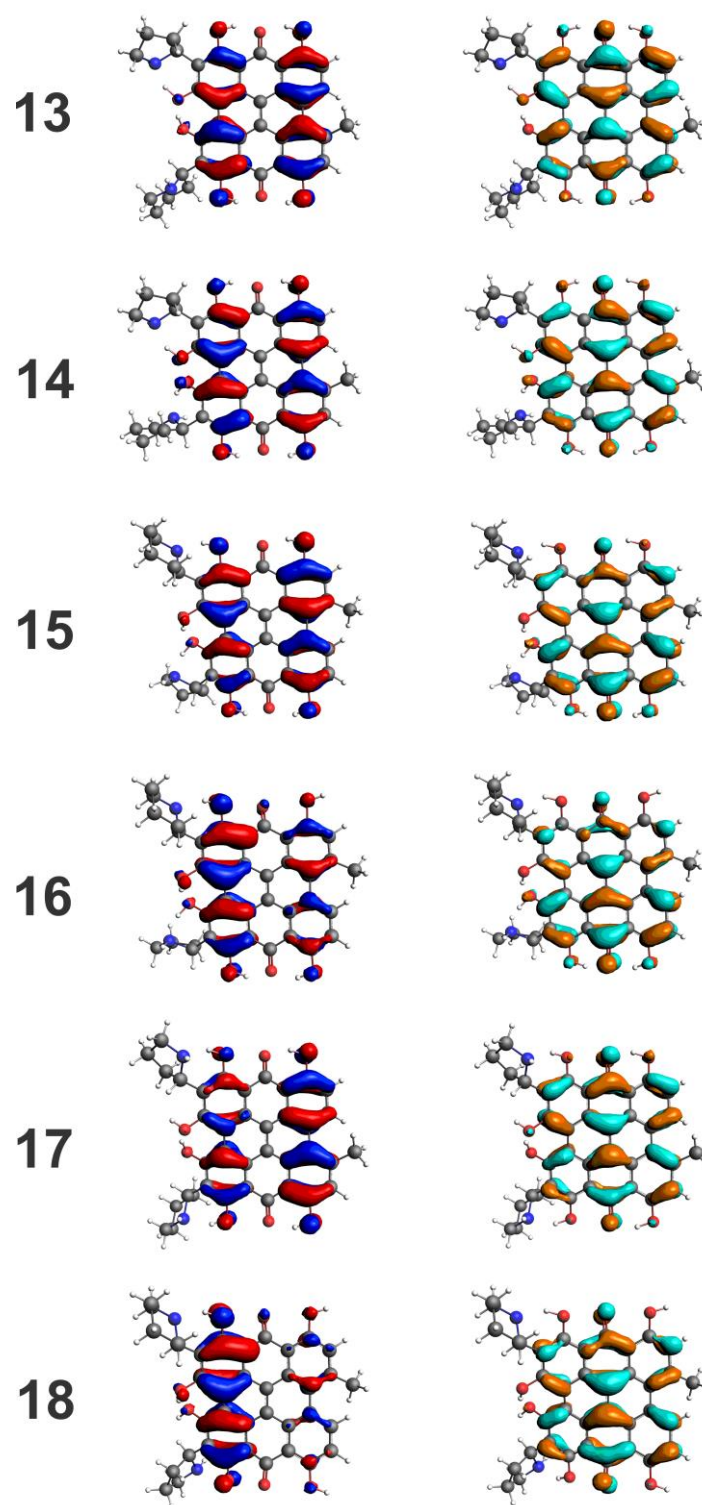

**Figure S3.** HOMO (left) and LUMO (right) orbitals for the 13, 14, 15, 16, 17 Fagopyrin C conformers.

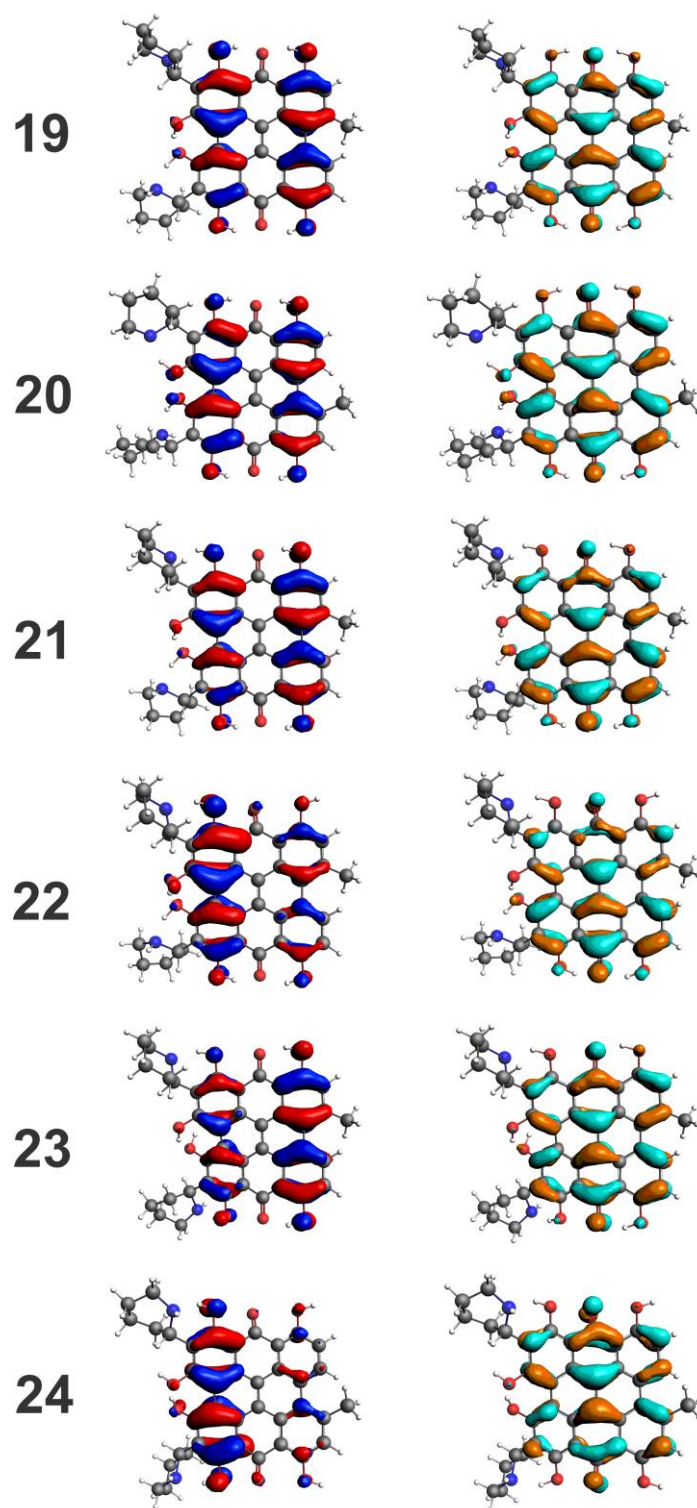

**Figure S4.** HOMO (left) and LUMO (right) orbitals for the 19, 20, 21, 22, 23, 24 Fagopyrin D conformers.



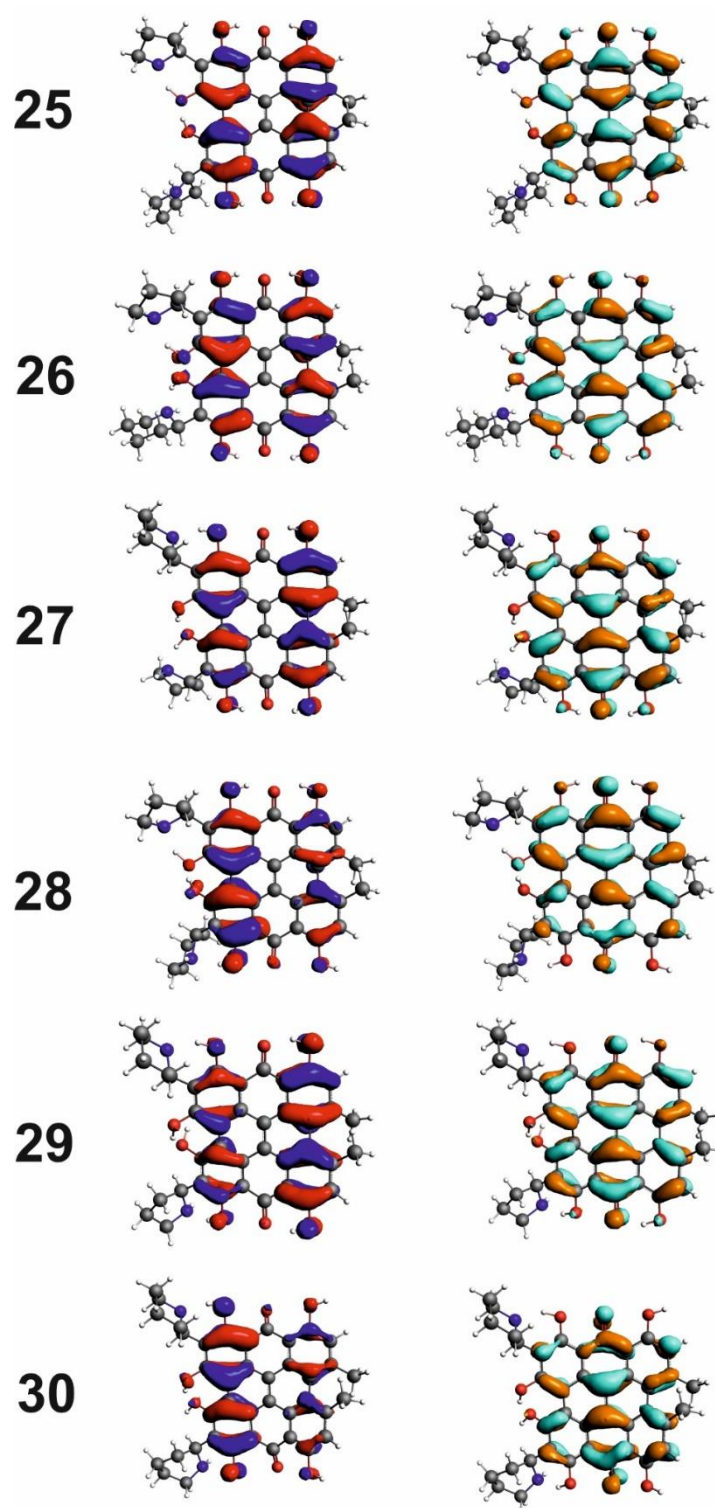

**Figure S5.** HOMO (left) and LUMO (right) orbitals for the 25, 26, 27, 28, 29, 30 Fagopyrin E conformers.

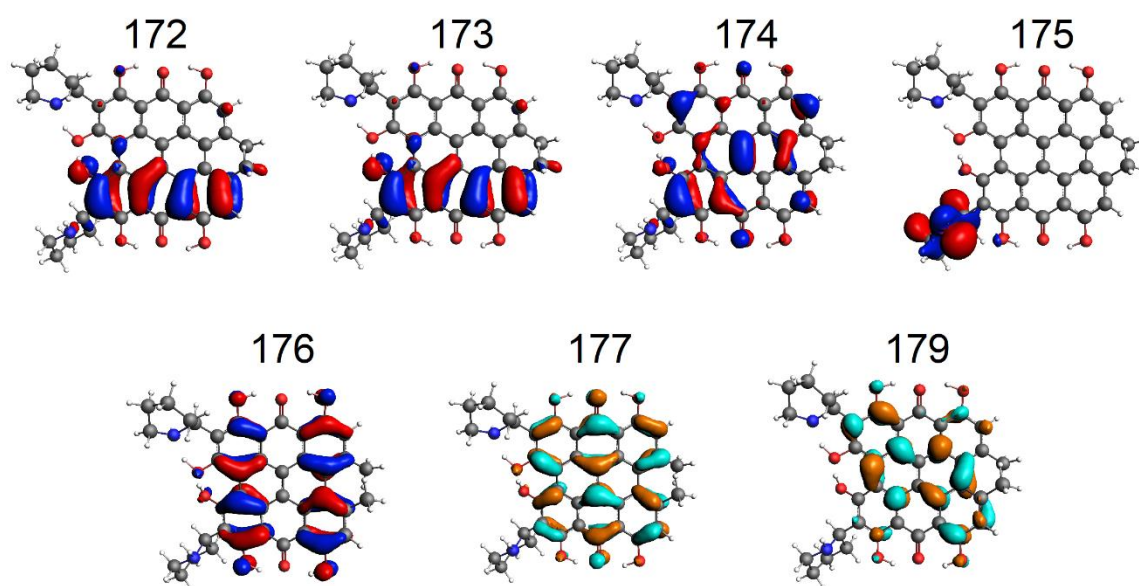

**Figure S6.** The shape of the orbitals for structure 31 (Fagopyrin F). 176 – HOMO and 177 – LUMO orbitals.

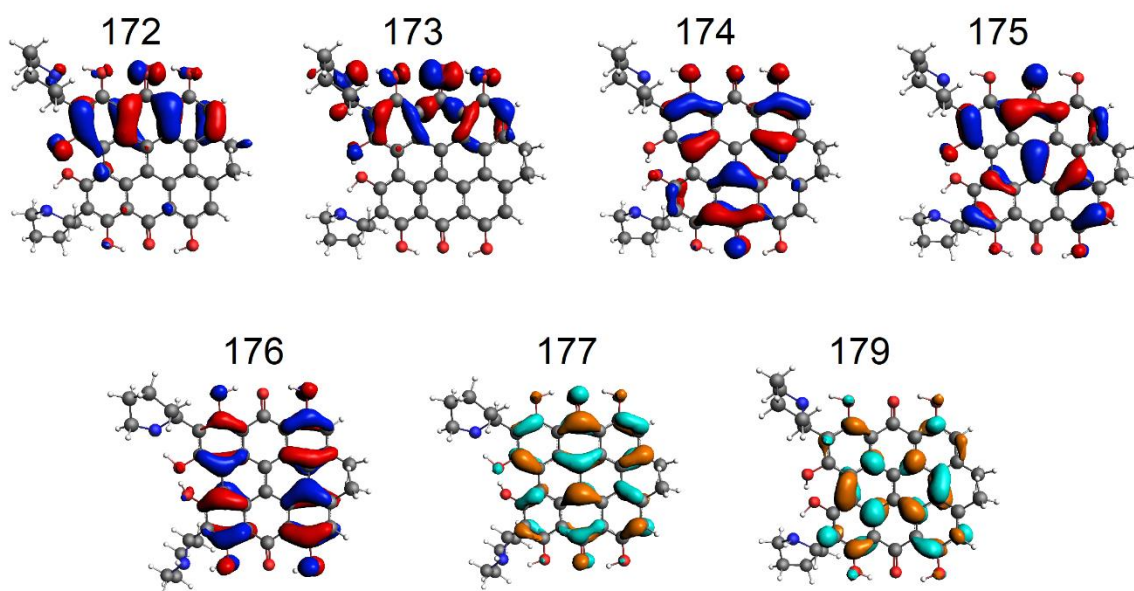

**Figure S7.** The shape of the orbitals for structure 33 (Fagopyrin F). 176 – HOMO and 177 – LUMO orbitals.

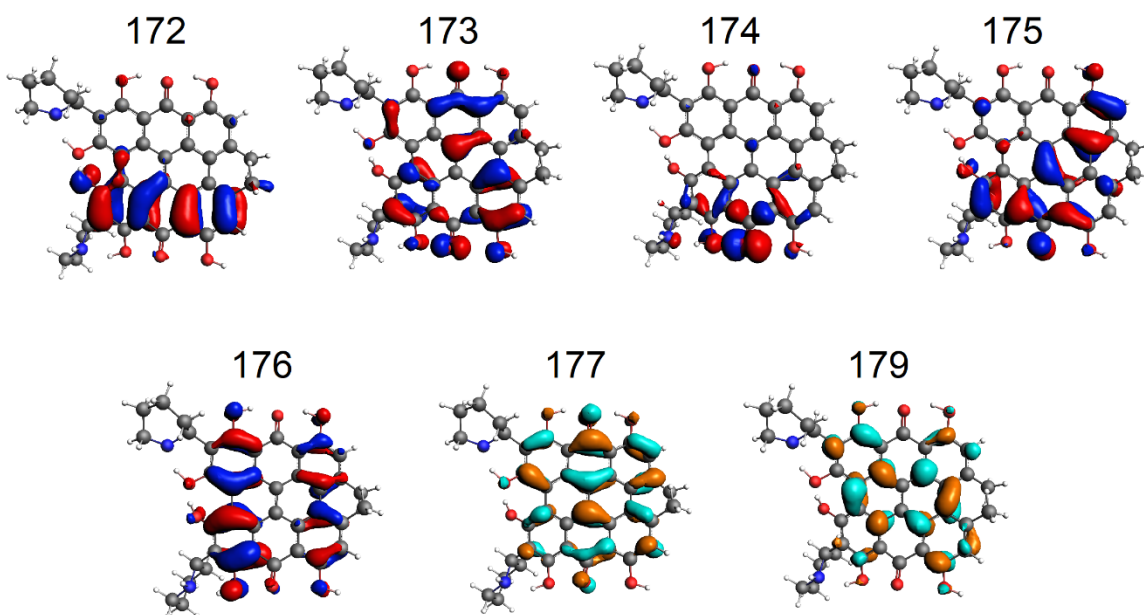

**Figure S8.** The shape of the orbitals for structure 34 (Fagopyrin F). 176 – HOMO and 177 – LUMO orbitals.

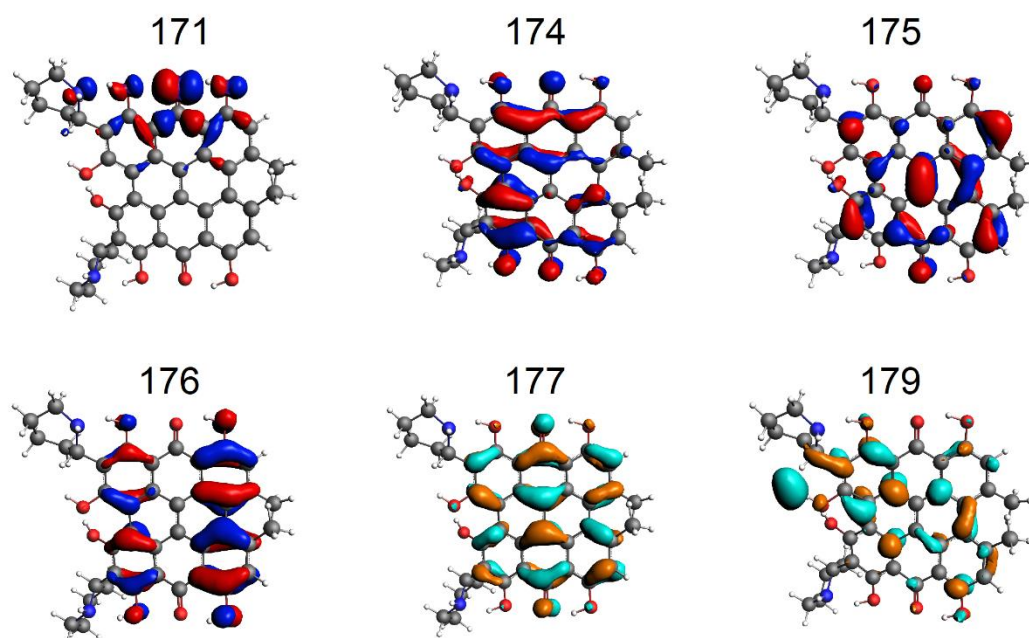

**Figure S9.** The shape of the orbitals for structure 35 (Fagopyrin F). 176 – HOMO and 177 – LUMO orbitals.

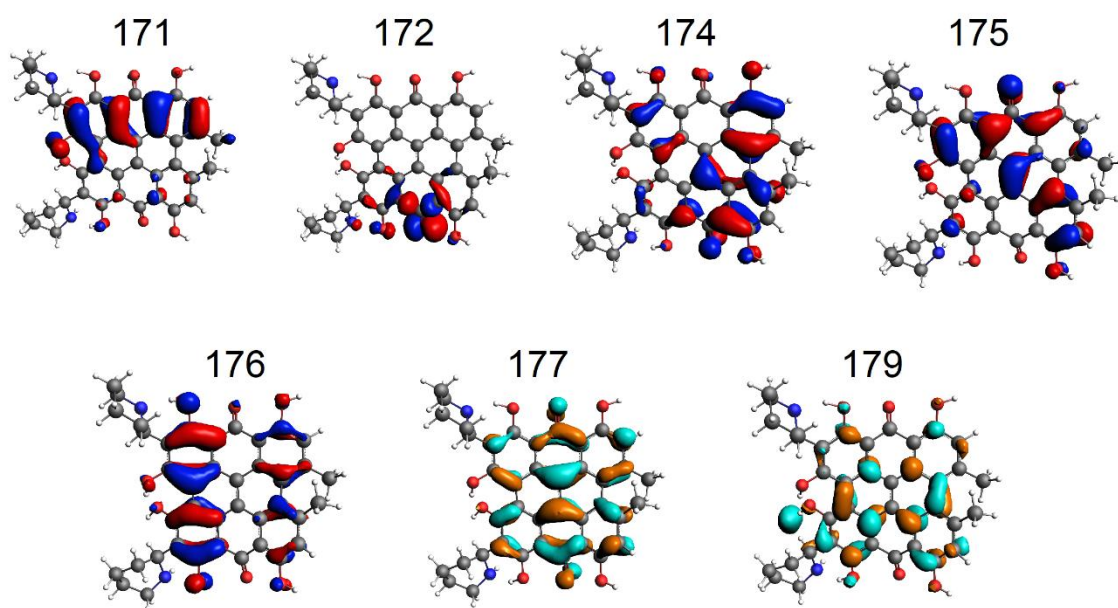

**Figure S10.** The shape of the orbitals for structure 36 (Fagopyrin F). 176 – HOMO and 177 – LUMO orbitals.
